# Supplementary material
Source: publisher site journal article supplement (https://www.dovepress.com/article/255833)
Supplement: Supplementary file 1 [file get_supplementary_file.php]

# Supporting Information

## **Enhanced antibacterial activity of Se nanoparticles upon coating with recombinant spider silk protein eADF4(κ16)**

Tao Huang<sup>1,2</sup>

Sushma Kumari<sup>2</sup>

Heike Herold<sup>2</sup>

Hendrik Bargel<sup>2</sup>

Tamara B. Aigner<sup>2</sup>

Daniel E. Heath<sup>1</sup>

Neil M. O'Brien-Simpson<sup>3</sup>

Andrea J. O'Connor<sup>1</sup>

Thomas Scheibel<sup>2,4</sup>

<sup>1</sup>Department of Biomedical Engineering, Melbourne School of Engineering, University of Melbourne, Parkville, VIC 3010, Australia; <sup>2</sup>Department for Biomaterials, Faculty of Engineering Science, University of Bayreuth, Prof. Rüdiger Bormann Str. 1, 95447 Bayreuth, Germany; <sup>3</sup>Melbourne Dental School and The Bio21 Institute of Molecular Science and Biotechnology, The University of Melbourne, Parkville, VIC 3010, Australia; <sup>4</sup>Bavarian Polymer Institute (BPI), Bayreuth Center for Material Science and Engineering (BayMAT), Bayreuth Center for Colloids and Interfaces (BZKG), Bayreuth Center for Molecular Biosciences (BZMB), University of Bayreuth, 95447 Bayreuth, Germany

Correspondence: Andrea J. O'Connor

Tel +61 3 8344 8962

Email [a.oconnor@unimelb.edu.au](mailto:a.oconnor@unimelb.edu.au)

Thomas Scheibel

Tel +49 (0)921 / 55-6701

Email [thomas.scheibel@bm.uni-bayreuth.de](mailto:thomas.scheibel@bm.uni-bayreuth.de)

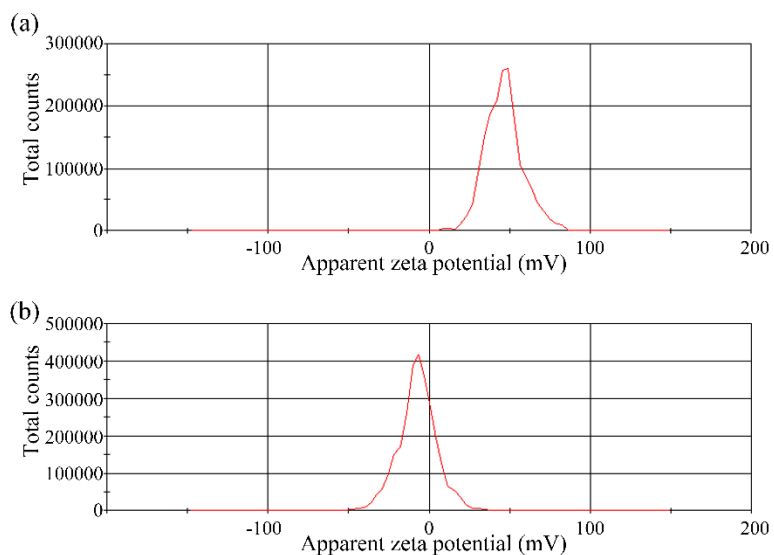

**Figure S1.** Zeta potential distribution of (a) 46 nm eADF4( $\kappa$ 16) stabilized Se NPs and (b) 46 nm PVA stabilized Se NPs.

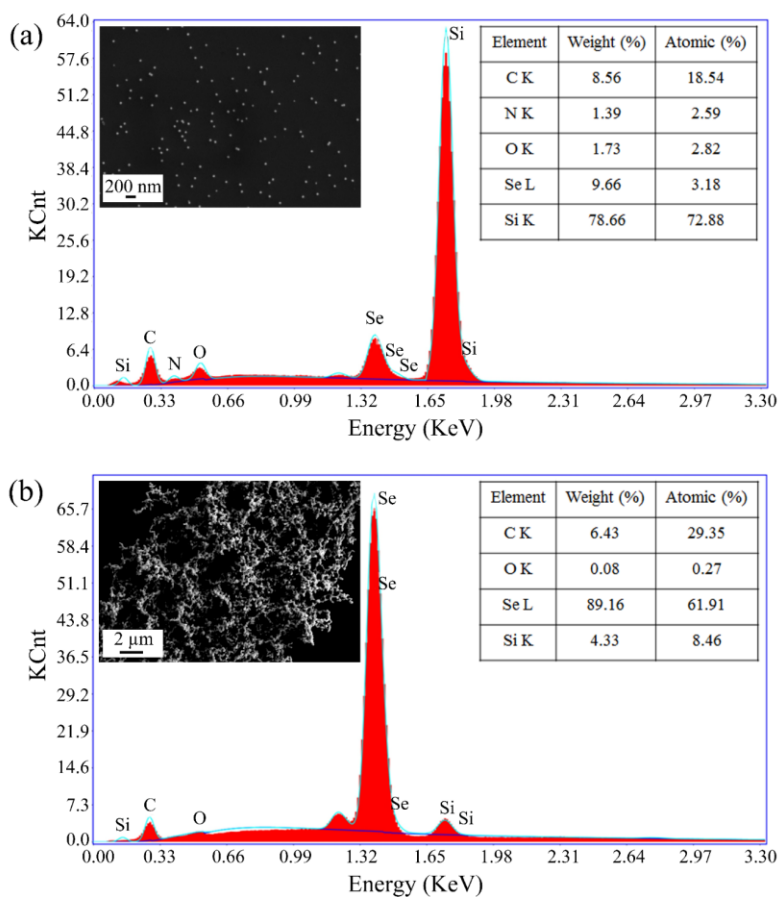

**Figure S2.** EDS of Se NPs: (a) eADF4( $\kappa$ 16) stabilized Se NPs, (b) eADF4( $\kappa$ 16) stabilized Se NPs after washing with guanidinium thiocyanate. High intensity for Se NPs in (b) shows aggregation of particles because of protein removal.

37

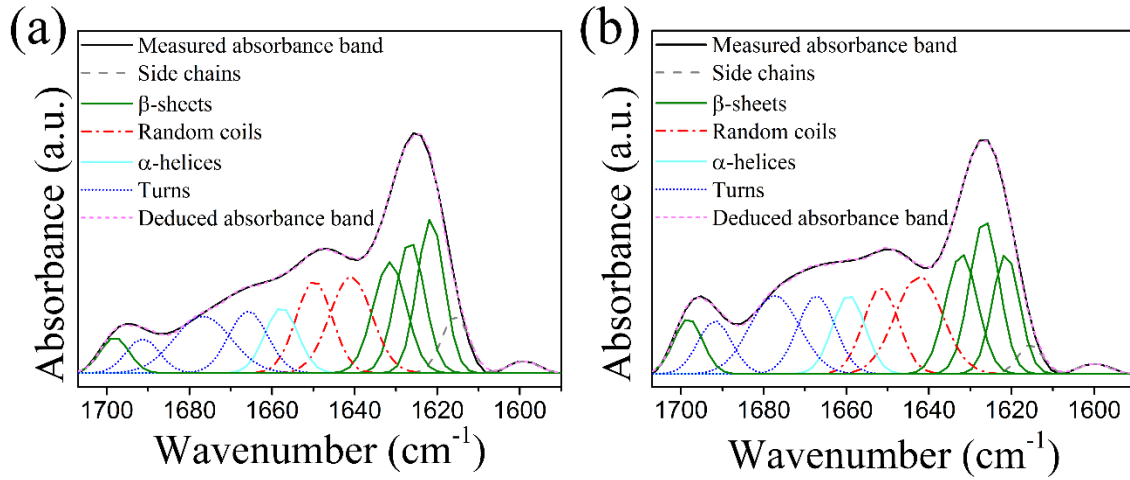

38

39 **Figure S3.** Fourier self-deconvoluted absorbance spectra of the amide I band of (a) eADF4(κ16) particles  
40 and (b) 46 nm eADF4(κ16) coated Se NPs.

41

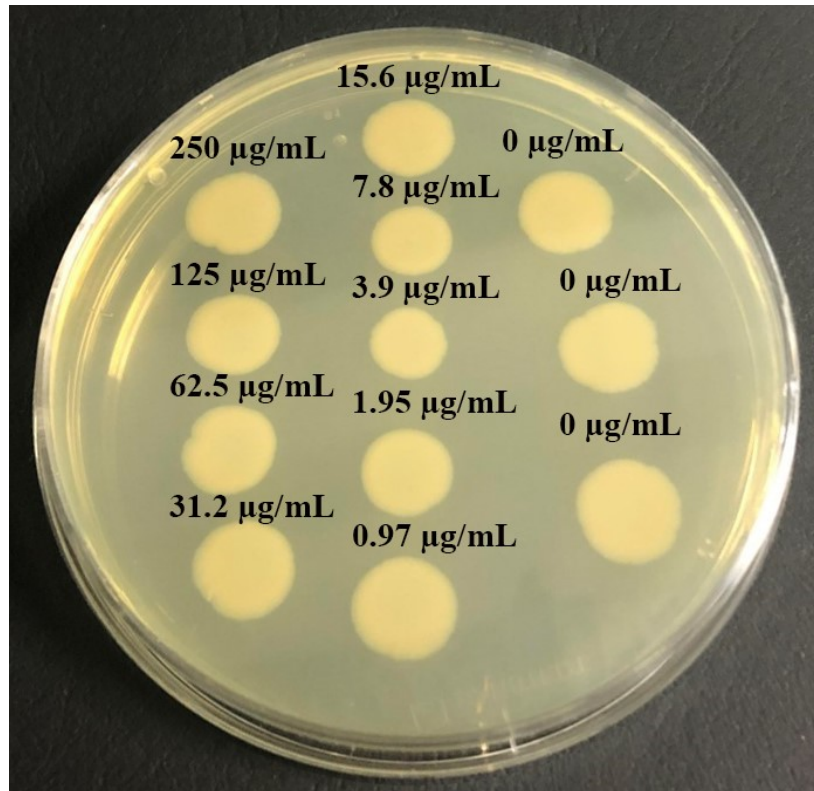

42

43 **Figure S4.** Colony forming units (CFU) assay using *E. coli* after treatment with eADF4(κ16) particles. No  
44 antibacterial activity was observed at concentrations from 0.97 µg/mL to 250 µg/mL.

45

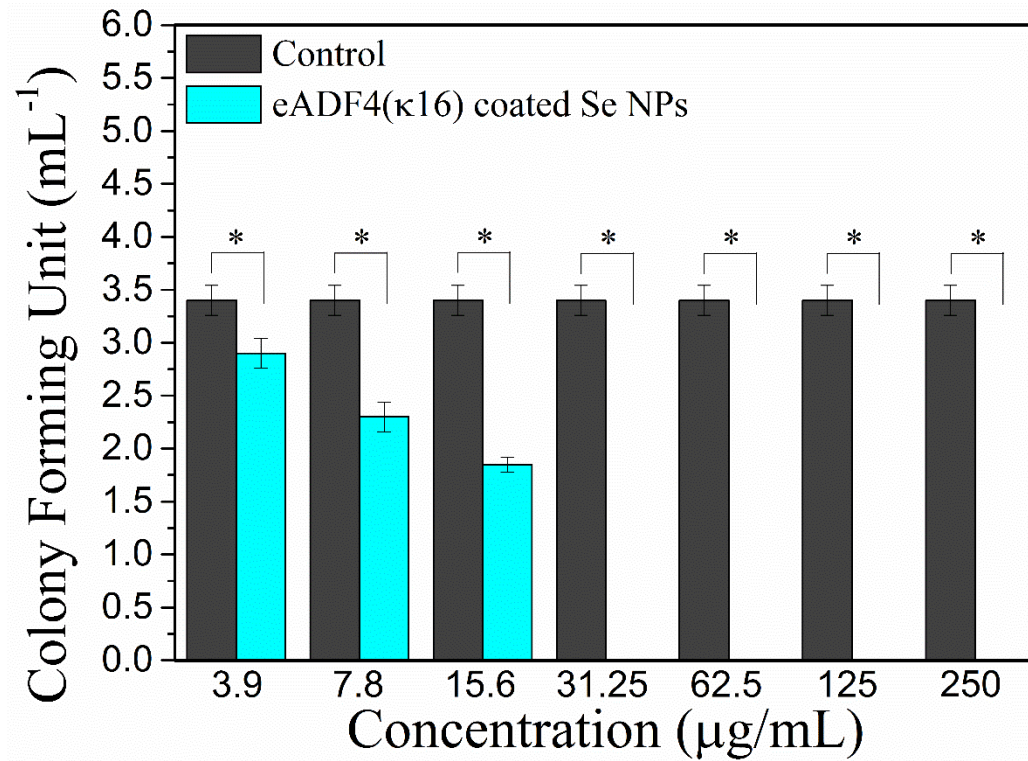

**Figure S5.** Colony forming units (CFU) assay using *S. aureus* (ATCC 29213) after treatment with eADF4(κ16) with varying concentrations from 3.9 μg/mL to 250 μg/mL. Student's t-test was used to compare means of experimental groups at each concentration, \* p-value < 0.05.
